# Supplementary material for: Mild Abiotic Stress Affects Development and Stimulates Hormesis of Hemp Aphid Phorodon cannabis
Source: MDPI journal article supplement (doi:10.3390/insects12050420), 2021-05-08
Supplement: s1 [file s1]

# Supplementary Material: Mild Abiotic Stress Affects Development and Stimulates Hormesis of Hemp Aphid *Phorodon cannabis*

Roma Durak, Malgorzata Jedryczka, Beata Czajka, Jan Dampc, Katarzyna Wielgusz and Beata Borowiak-Sobkowiak

**Table S1.** The test of normality and analysis of variance.

| Variables                 | Normality          | <i>p</i> - value | Analysis of Variance | <i>p</i> -Value |
|---------------------------|--------------------|------------------|----------------------|-----------------|
| SOD                       | 0.953 <sup>1</sup> | 0.086            | 2.908                | 0.357           |
| CAT                       | 0.951 <sup>1</sup> | 0.073            | 3.157                | 0.571           |
| β-Glucosidase             | 0.954 <sup>1</sup> | 0.093            | 2.471                | 0.996           |
| GST                       | 0.960 <sup>1</sup> | 0.151            | 6.756                | 0.818           |
| PPO                       | 0.959 <sup>1</sup> | 0.139            | 3.889                | 0.298           |
| POD                       | 0.954 <sup>1</sup> | 0.096            | 2.652                | 0.200           |
| aphid population (3 days) | 0.929 <sup>1</sup> | 0.295            | 0.637                | 0.648           |
| aphid population (5 days) | 0.881 <sup>1</sup> | 0.061            | 5.033                | 0.284           |
| aphid population (7 days) | 0.968 <sup>1</sup> | 0.851            | 1.868                | 0.193           |
| pre-reproduction          | 0.075 <sup>2</sup> | 0.133            | 182.620              | 0.470           |
| reproduction              | 0.146 <sup>2</sup> | 0.138            | 43.511               | 0.893           |
| post-reproduction         | 0.293 <sup>2</sup> | 0.144            | 95.038               | 0.938           |
| longevity                 | 0.066 <sup>2</sup> | 0.151            | 15.013               | 0.069           |
| fecundity                 | 0.059 <sup>2</sup> | 0.129            | 51.911               | 0.351           |

Test of normality: <sup>1</sup> Shapiro-Wilk test, <sup>2</sup> Lilliefors test; Analysis of variance: Levene test.
